# Supplementary material for: Characteristics associated with HIV and hepatitis C seroprevalence among sexual and injecting partners of HIV positive persons who inject drugs in Nairobi and coastal Kenya
Source: Springer Nature journal article supplement (doi:10.1186/s12879-022-07036-8), 2022-01-21
Supplement: MOESM1 [file 20056262]

| variable                                            | All enrolled<br>(N=2,462) |           | Final dataset<br>(N=2,386) |           |
|-----------------------------------------------------|---------------------------|-----------|----------------------------|-----------|
|                                                     | N missing                 | % missing | N missing                  | % missing |
| times injecting per month*                          | 270                       | 11        | 215                        | 9         |
| shared needles (past month)*                        | 270                       | 11        | 215                        | 9         |
| shared equipment (past month)*                      | 270                       | 11        | 215                        | 9         |
| injected blood (past month)*                        | 270                       | 11        | 215                        | 9         |
| on methadone now*                                   | 270                       | 11        | 215                        | 9         |
| years injecting                                     | 53                        | 2.2       | 0                          | 0         |
| used heroin (past month)                            | 47                        | 1.9       | 0                          | 0         |
| used benzos (past month)                            | 47                        | 1.9       | 0                          | 0         |
| used cocaine (past month)                           | 47                        | 1.9       | 0                          | 0         |
| used a condom when last had sex                     | 34                        | 1.4       | 28                         | 1.2       |
| partner type                                        | 28                        | 1.1       | 28                         | 1.2       |
| Positive HCV test                                   | 17                        | 0.69      | 0                          | 0         |
| Positive HIV test                                   | 11                        | 0.45      | 0                          | 0         |
| sex_partners_3mo_group                              | 7                         | 0.28      | 3                          | 0.13      |
| sex_partners_3mo_group.1                            | 7                         | 0.28      | 3                          | 0.13      |
| Received money for sex (ever)                       | 7                         | 0.28      | 3                          | 0.13      |
| gave money for sex (ever)                           | 7                         | 0.28      | 3                          | 0.13      |
| had sex with someone knew to be HIV positive (ever) | 7                         | 0.28      | 3                          | 0.13      |
| sex                                                 | 5                         | 0.2       | 0                          | 0         |
| age                                                 | 5                         | 0.2       | 0                          | 0         |
| marital status                                      | 4                         | 0.16      | 0                          | 0         |
| have stable housing                                 | 4                         | 0.16      | 0                          | 0         |
| previously tested for HIV                           | 4                         | 0.16      | 0                          | 0         |
| previously tested for HCV                           | 4                         | 0.16      | 0                          | 0         |
| experienced physical violence (past year)           | 4                         | 0.16      | 0                          | 0         |
| site enrolled                                       | 0                         | 0         | 0                          | 0         |
| identified by multiple partners                     | 0                         | 0         | 0                          | 0         |
| Previously tested positive for HIV                  | 0                         | 0         | 0                          | 0         |
| Previously tested for HCV                           | 0                         | 0         | 0                          | 0         |
| used alcohol (past month)                           | 0                         | 0         | 0                          | 0         |
| region recruited                                    | 0                         | 0         | 0                          | 0         |

\*These variables were analyzed only among PWID, so missingness includes people who do not inject drugs by design

**Supplemental table 1.** Missingness among analyzed variables for all enrolled and in final dataset used in analysis.

|                                                  | Coast<br>(N=1026) | Nairobi (N=1360)  | Total (N=2386)    | p value |
|--------------------------------------------------|-------------------|-------------------|-------------------|---------|
| <b>site</b>                                      |                   |                   |                   | <0.001  |
| Githurai                                         | 0 (0.0%)          | 375 (27.6%)       | 375 (15.7%)       |         |
| Kilifi-MEWA                                      | 79 (7.7%)         | 0 (0.0%)          | 79 (3.3%)         |         |
| Malind-Omari                                     | 445 (43.4%)       | 0 (0.0%)          | 445 (18.7%)       |         |
| Mtwapa-MEWA                                      | 194 (18.9%)       | 0 (0.0%)          | 194 (8.1%)        |         |
| Ngara                                            | 0 (0.0%)          | 593 (43.6%)       | 593 (24.9%)       |         |
| Pangani                                          | 0 (0.0%)          | 392 (28.8%)       | 392 (16.4%)       |         |
| Reachout                                         | 308 (30.0%)       | 0 (0.0%)          | 308 (12.9%)       |         |
| <b>SOCIODEMOGRAPHIC CHARACTERISTICS</b>          |                   |                   |                   |         |
| <b>partnertype</b>                               |                   |                   |                   | <0.001  |
| Both sexual & Injecting                          | 236 (23.4%)       | 211 (15.6%)       | 447 (19.0%)       |         |
| Injecting                                        | 602 (59.7%)       | 928 (68.7%)       | 1530 (64.9%)      |         |
| Sexual                                           | 170 (16.9%)       | 211 (15.6%)       | 381 (16.2%)       |         |
| <b>number of times named</b>                     |                   |                   |                   | <0.001  |
| once                                             | 736 (71.7%)       | 1168 (85.9%)      | 1904 (79.8%)      |         |
| more than once                                   | 290 (28.3%)       | 192 (14.1%)       | 482 (20.2%)       |         |
| <b>sex</b>                                       |                   |                   |                   | <0.001  |
| Female                                           | 230 (22.4%)       | 521 (38.3%)       | 751 (31.5%)       |         |
| Male                                             | 796 (77.6%)       | 839 (61.7%)       | 1635 (68.5%)      |         |
| <b>age</b>                                       |                   |                   |                   | <0.001  |
| Mean (SD)                                        | 35.3 (7.6)        | 31.8 (8.0)        | 33.3 (8.0)        |         |
| Range                                            | 19.0 - 60.0       | 18.0 - 74.0       | 18.0 - 74.0       |         |
| Median (IQR)                                     | 35.0 (30.0, 40.8) | 31.0 (25.0, 37.0) | 33.0 (27.0, 39.0) |         |
| <b>marital_status</b>                            |                   |                   |                   | <0.001  |
| Single                                           | 319 (31.1%)       | 682 (50.1%)       | 1001 (42.0%)      |         |
| Divorced                                         | 268 (26.1%)       | 276 (20.3%)       | 544 (22.8%)       |         |
| Partnered                                        | 93 (9.1%)         | 53 (3.9%)         | 146 (6.1%)        |         |
| Married or widowed                               | 346 (33.7%)       | 349 (25.7%)       | 695 (29.1%)       |         |
| <b>have stable housing</b>                       |                   |                   |                   | 0.0011  |
| No                                               | 111 (10.8%)       | 210 (15.4%)       | 321 (13.5%)       |         |
| Yes                                              | 915 (89.2%)       | 1150 (84.6%)      | 2065 (86.5%)      |         |
| <b>experienced physical violence (past year)</b> |                   |                   |                   | <0.001  |
| No                                               | 574 (55.9%)       | 944 (69.4%)       | 1518 (63.6%)      |         |
| Yes                                              | 452 (44.1%)       | 416 (30.6%)       | 868 (36.4%)       |         |
| <b>HIV/HCV HISTORY AND TEST RESULTS</b>          |                   |                   |                   |         |
| <b>previously tested for HIV</b>                 |                   |                   |                   | <0.001  |
| No                                               | 98 (9.6%)         | 32 (2.4%)         | 130 (5.4%)        |         |
| Yes                                              | 928 (90.4%)       | 1328 (97.6%)      | 2256 (94.6%)      |         |
| <b>previously tested positive for HIV</b>        |                   |                   |                   | <0.001  |
| No                                               | 814 (79.3%)       | 1166 (85.7%)      | 1980 (83.0%)      |         |
| Yes                                              | 212 (20.7%)       | 194 (14.3%)       | 406 (17.0%)       |         |
| <b>previously tested for HCV</b>                 |                   |                   |                   | <0.001  |
| No                                               | 898 (87.5%)       | 986 (72.5%)       | 1884 (79.0%)      |         |
| Yes                                              | 128 (12.5%)       | 374 (27.5%)       | 502 (21.0%)       |         |
| <b>previously tested seropositive for HCV</b>    |                   |                   |                   | 0.91    |
| No                                               | 991 (96.6%)       | 1315 (96.7%)      | 2306 (96.6%)      |         |
| Yes                                              | 35 (3.4%)         | 45 (3.3%)         | 80 (3.4%)         |         |
| <b>HIV positive test</b>                         |                   |                   |                   | <0.001  |
| FALSE                                            | 787 (76.7%)       | 1130 (83.1%)      | 1917 (80.3%)      |         |
| TRUE                                             | 239 (23.3%)       | 230 (16.9%)       | 469 (19.7%)       |         |
| <b>HCV seropositive test</b>                     |                   |                   |                   | <0.001  |
| FALSE                                            | 847 (82.6%)       | 1242 (91.3%)      | 2089 (87.6%)      |         |
| TRUE                                             | 179 (17.4%)       | 118 (8.7%)        | 297 (12.4%)       |         |
| <b>SEXUAL HISTORY</b>                            |                   |                   |                   |         |

|                                                            |                   |                   |                   |        |
|------------------------------------------------------------|-------------------|-------------------|-------------------|--------|
| <b>number of sexual partners (past 3 months)</b>           |                   |                   |                   | <0.001 |
| 0                                                          | 330 (32.2%)       | 811 (59.7%)       | 1141 (47.9%)      |        |
| 1-2                                                        | 483 (47.1%)       | 390 (28.7%)       | 873 (36.6%)       |        |
| >2                                                         | 212 (20.7%)       | 157 (11.6%)       | 369 (15.5%)       |        |
| <b>received money for sex (ever)</b>                       |                   |                   |                   | <0.001 |
| No                                                         | 572 (55.8%)       | 877 (64.6%)       | 1449 (60.8%)      |        |
| Yes                                                        | 453 (44.2%)       | 481 (35.4%)       | 934 (39.2%)       |        |
| <b>gave money for sex (ever)</b>                           |                   |                   |                   | <0.001 |
| No                                                         | 418 (40.8%)       | 912 (67.2%)       | 1330 (55.8%)      |        |
| Yes                                                        | 607 (59.2%)       | 446 (32.8%)       | 1053 (44.2%)      |        |
| <b>had sex with someone knew to be HIV positive (ever)</b> |                   |                   |                   | <0.001 |
| No                                                         | 799 (78.0%)       | 1211 (89.2%)      | 2010 (84.3%)      |        |
| Yes                                                        | 226 (22.0%)       | 147 (10.8%)       | 373 (15.7%)       |        |
| <b>used a condom when last had sex</b>                     |                   |                   |                   | 0.11   |
| No                                                         | 569 (56.4%)       | 716 (53.1%)       | 1285 (54.5%)      |        |
| Yes                                                        | 440 (43.6%)       | 633 (46.9%)       | 1073 (45.5%)      |        |
| <b>DRUG USE</b>                                            |                   |                   |                   |        |
| <b>used heroin (past month)</b>                            |                   |                   |                   | <0.001 |
| No                                                         | 149 (14.5%)       | 74 (5.4%)         | 223 (9.3%)        |        |
| Yes                                                        | 877 (85.5%)       | 1286 (94.6%)      | 2163 (90.7%)      |        |
| <b>used benzos (past month)</b>                            |                   |                   |                   | 0.35   |
| No                                                         | 856 (83.4%)       | 1114 (81.9%)      | 1970 (82.6%)      |        |
| Yes                                                        | 170 (16.6%)       | 246 (18.1%)       | 416 (17.4%)       |        |
| <b>used cocaine (past month)</b>                           |                   |                   |                   | <0.001 |
| No                                                         | 913 (89.0%)       | 1291 (94.9%)      | 2204 (92.4%)      |        |
| Yes                                                        | 113 (11.0%)       | 69 (5.1%)         | 182 (7.6%)        |        |
| <b>used alcohol (past month)</b>                           |                   |                   |                   | 0.54   |
| No                                                         | 679 (66.2%)       | 917 (67.4%)       | 1596 (66.9%)      |        |
| Yes                                                        | 347 (33.8%)       | 443 (32.6%)       | 790 (33.1%)       |        |
| <b>INJECTION DRUG USE BEHAVIORS</b>                        |                   |                   |                   |        |
| <b>years injecting</b>                                     |                   |                   |                   | 0.085  |
| 0 (don't inject)                                           | 95 (9.3%)         | 121 (8.9%)        | 216 (9.1%)        |        |
| <5                                                         | 540 (52.6%)       | 776 (57.1%)       | 1316 (55.2%)      |        |
| ≥5                                                         | 391 (38.1%)       | 463 (34.0%)       | 854 (35.8%)       |        |
| <b>times injecting per month</b>                           |                   |                   |                   | 0.49   |
| Mean (SD)                                                  | 70.1 (51.5)       | 72.4 (94.0)       | 71.4 (78.6)       |        |
| Range                                                      | 0.0 - 360.0       | 0.0 - 3000.0      | 0.0 - 3000.0      |        |
| Median (Q1, Q3)                                            | 60.0 (30.0, 90.0) | 60.0 (56.0, 90.0) | 60.0 (30.0, 90.0) |        |
| <b>shared needles (past month)</b>                         |                   |                   |                   | <0.001 |
| No                                                         | 909 (97.6%)       | 1168 (94.2%)      | 2077 (95.7%)      |        |
| Yes                                                        | 22 (2.4%)         | 72 (5.8%)         | 94 (4.3%)         |        |
| <b>shared equipment (past month)</b>                       |                   |                   |                   | <0.001 |
| No                                                         | 904 (97.1%)       | 1053 (84.9%)      | 1957 (90.1%)      |        |
| Yes                                                        | 27 (2.9%)         | 187 (15.1%)       | 214 (9.9%)        |        |
| <b>injected blood (past month)</b>                         |                   |                   |                   | 1      |
| No                                                         | 917 (98.5%)       | 1222 (98.5%)      | 2139 (98.5%)      |        |
| Yes                                                        | 14 (1.5%)         | 18 (1.5%)         | 32 (1.5%)         |        |
| <b>on methadone</b>                                        |                   |                   |                   | <0.001 |
| No                                                         | 600 (64.4%)       | 1094 (88.2%)      | 1694 (78.0%)      |        |
| Yes                                                        | 331 (35.6%)       | 146 (11.8%)       | 477 (22.0%)       |        |
| <b>stopped_methadone now</b>                               |                   |                   |                   | <0.001 |
| No                                                         | 331 (74.4%)       | 146 (57.3%)       | 477 (68.1%)       |        |
| Yes                                                        | 114 (25.6%)       | 109 (42.7%)       | 223 (31.9%)       |        |

**Supplemental Table 2.** Matches Table 1 from, but showing both categories for binary variables.
